# Supplementary material for: Structure of a DNA G-Quadruplex Related to Osteoporosis with a G-A Bulge Forming a Pseudo-loop
Source: PubMed Central journal article supplement (PMC7588008; doi:10.3390/molecules25204867), 2020-10-21
Supplement: molecules-25-04867-s001.pdf [file molecules-25-04867-s001.pdf]

# Supplementary Information

## Structure of a DNA G-quadruplex related to osteoporosis with a G-A bulge forming a *pseudo-loop*

Martina Lenarčič Živković<sup>1,2,\*</sup>, Jan Rozman<sup>1</sup> and Janez Plavec<sup>1,3,4,\*</sup>

<sup>1</sup> Slovenian NMR Centre, National Institute of Chemistry, Hajdrihova 19, 1000 Ljubljana, Slovenia;  
jan.rozman@gmail.com

<sup>2</sup> Central European Institute of Technology, Masaryk University, Kamenice 753/5, 60177 Brno, Czech Republic

<sup>3</sup> EN-FIST Centre of Excellence, Trg OF 13, Ljubljana 1000, Slovenia

<sup>4</sup> Faculty of Chemistry and Chemical Technology, University of Ljubljana, Večna pot 113, 1000 Ljubljana, Slovenia

\* Correspondence: janez.plavec@ki.si (J.P.); martina.lenaric@ki.si (M.L.Ž.)

**Table S1.** List of modified RAN1\* constructs used in this study.

| Name of the Construct | Sequence (5' → 3')    | Length of the Construct (nt) |
|-----------------------|-----------------------|------------------------------|
| G14T                  | TGGGAGGGAGCGGTAGTGGG  | 20                           |
| A15T                  | TGGGAGGGAGCGGTTGTGGG  | 20                           |
| G14TA15T              | TGGGAGGGAGCGGTTGTGGG  | 20                           |
| ΔG14                  | TGGGAGGGAGCGG-AGTGGG  | 19                           |
| ΔA15                  | TGGGAGGGAGCGGG-GTGGG  | 19                           |
| ΔG14A15               | TGGGAGGGAGCGG--GTGGG  | 18                           |
| G14A15 <i>ins</i> T   | TGGGAGGGAGCGGTTAGTGGG | 21                           |

**Table S2.** Change in groove dimensions (Å) of RAN1\* at the site of G16 in *syn* glycosidic conformation.

| Groove Number | Defined by | Groove Type | Groove Dimension (Å)* | Average Groove Dimension (Å)** | Change in Groove Width (Å) |
|---------------|------------|-------------|-----------------------|--------------------------------|----------------------------|
| 1             | G2-G6      | <i>m</i>    | 14.8                  | 16.2                           |                            |
|               | G3-G7      | <i>m</i>    | 17.5                  |                                |                            |
|               | G4-G8      | <i>m</i>    | 16.3                  |                                |                            |
| 2             | G6-G12     | <i>m</i>    | 17.3                  | 17.3                           |                            |
|               | G7-G13     | <i>m</i>    | 17.3                  |                                |                            |
|               | G8-G16     | <i>w</i>    | 19.4                  |                                |                            |
| 3             | G12-G18    | <i>m</i>    | 14.7                  | 15.9                           |                            |
|               | G13-G19    | <i>m</i>    | 17.1                  |                                |                            |
|               | G16-G20    | <i>n</i>    | 9.3                   |                                |                            |
| 4             | G18-G2     | <i>m</i>    | 15.1                  | 16.0                           |                            |
|               | G19-G3     | <i>m</i>    | 16.8                  |                                |                            |
|               | G20-G4     | <i>m</i>    | 16.1                  |                                |                            |

\*Groove dimension corresponds to a P-P distance between pairs of guanines from different G-quartets that define the individual groove (Figure S7). Distances were measured in UCSF Chimera Software (Pettersen *et al.*, *J. Comput. Chem.* **2004**, 25 (13), 1605-1612).

\*\*Groove dimension was averaged over the same groove type only.

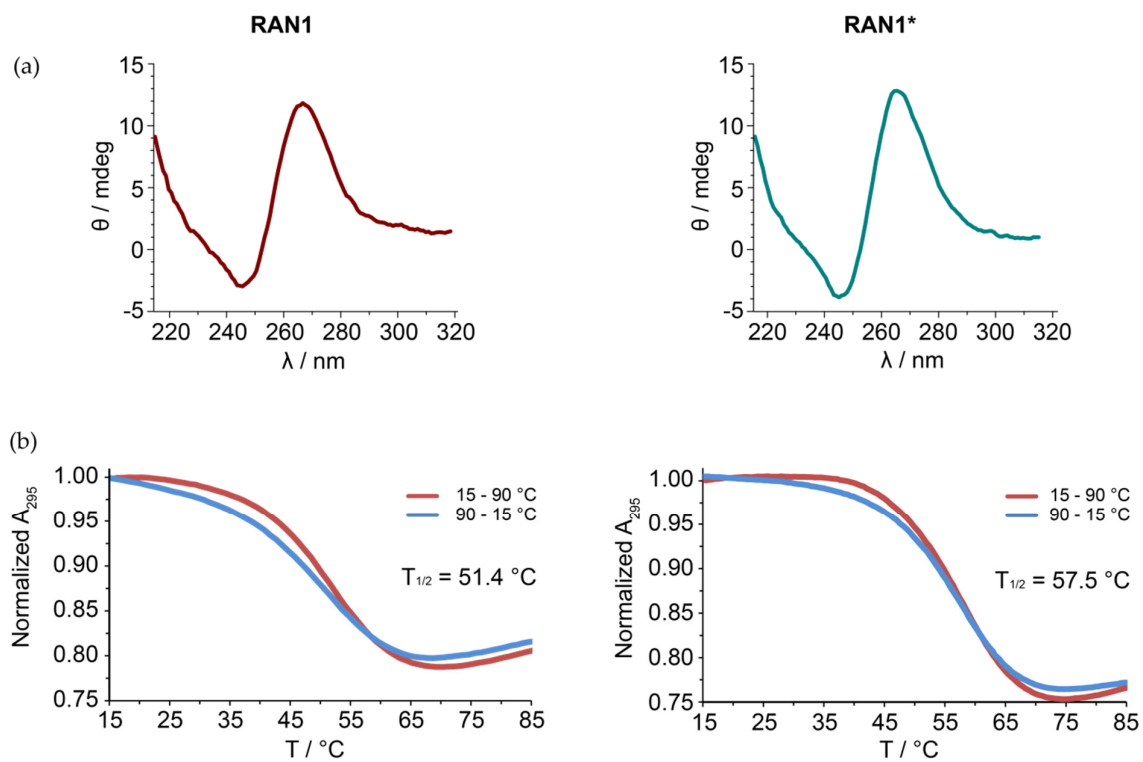

**Figure S1.** (a) CD spectra and (b) UV melting temperature experiments of RAN1 and RAN1\* constructs.

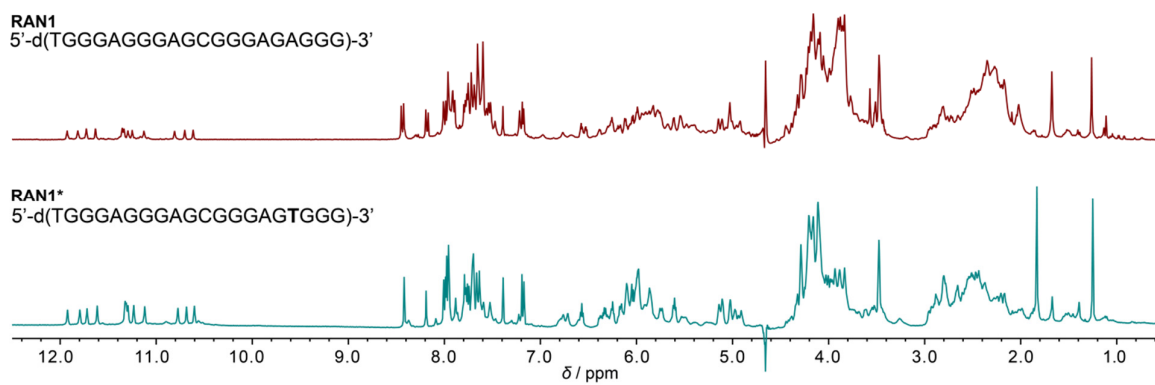

**Figure S2.** Full 1D  $^1\text{H}$ -NMR spectra of RAN1 and RAN1\* in the presence of 50 mM KCl, 10 mM potassium phosphate buffer, 0.6 mM DNA concentration per strand, pH 7.0 and 25 °C on a 600 MHz NMR spectrometer.

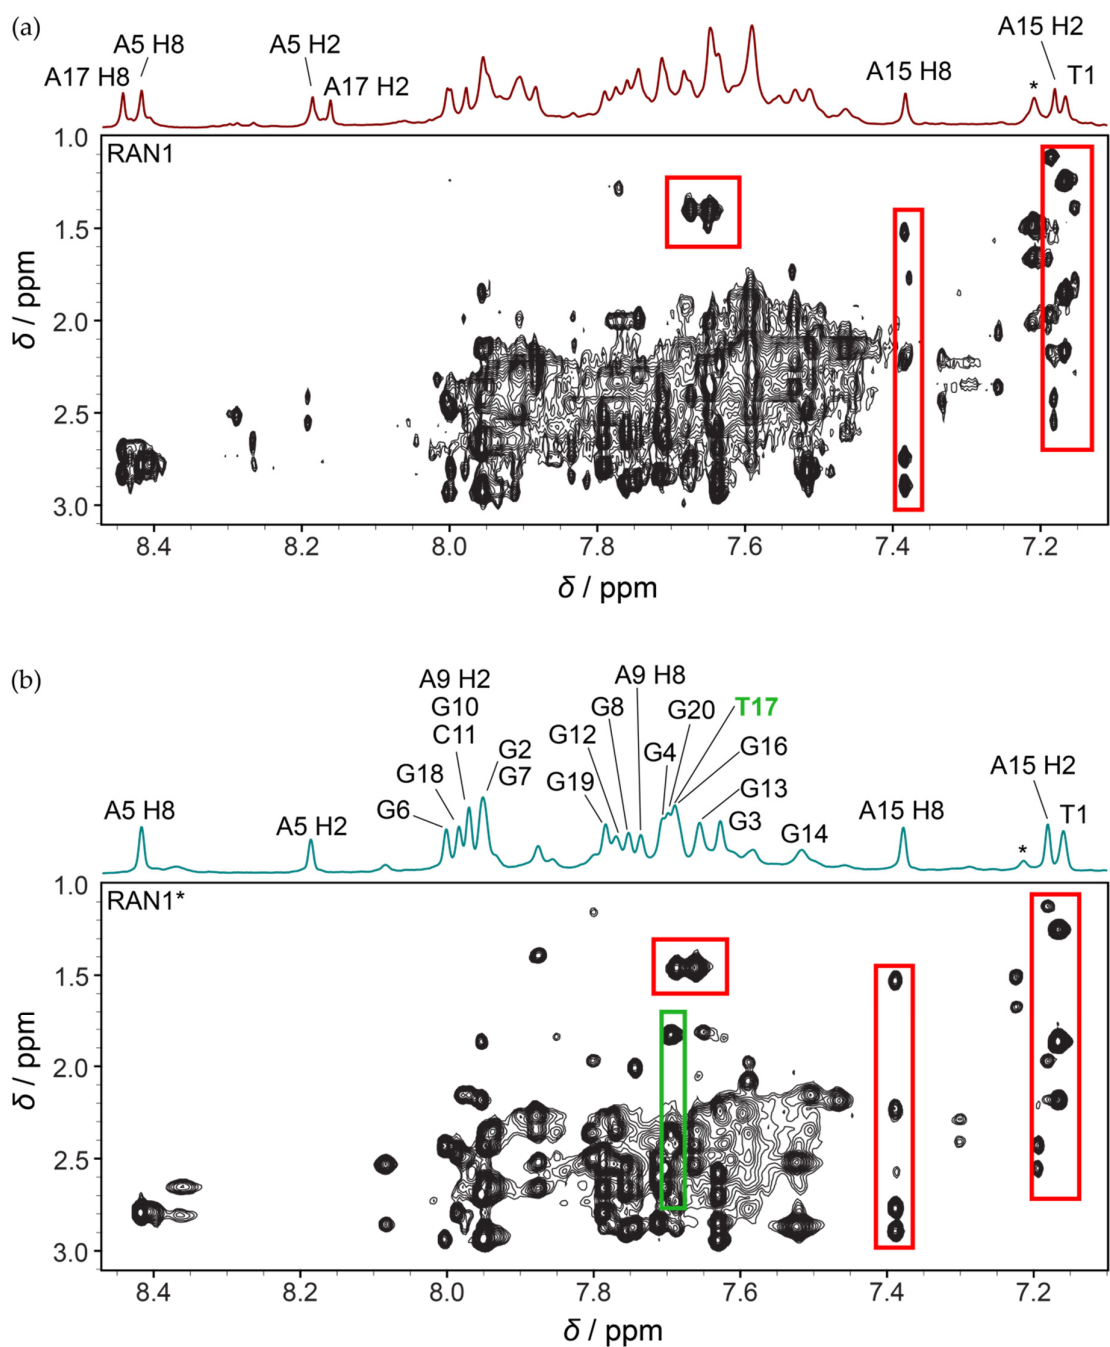

**Figure S3.** The aromatic-sugar H2'/H2'' region of NOESY spectrum ( $\tau_m = 200$  ms) of RAN1 (A) and RAN1\* (B). Representative signal of unfolded species is marked with \*. NOE signals distinctive of RAN1\* structure are boxed with red. Signals of T17 that appear after the A17-to-T17 modification are boxed with green.

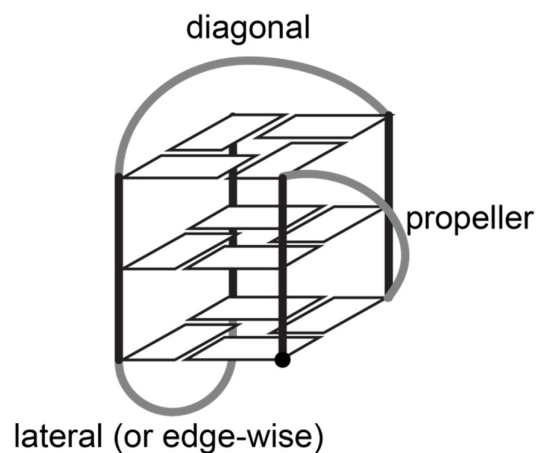

**Figure S4.** Schematic presentation of a G-quadruplex topology with all three possible loop types: propeller, diagonal, and lateral (sometimes also referred as edge-wise). Propeller-type loop connects two guanines from the top and the bottom G-quartet from adjacent G-strands in parallel orientation. Diagonal loop joins opposite anti-parallel G-strands by connecting two guanines from the same G-quartet. Similarly, lateral loop connects two guanines from the same G-quartet, however, linking adjacent anti-parallel G-strands. Guanines are shown as white rectangles, while loops are coloured grey. The 5'-guanine is marked by a black dot.

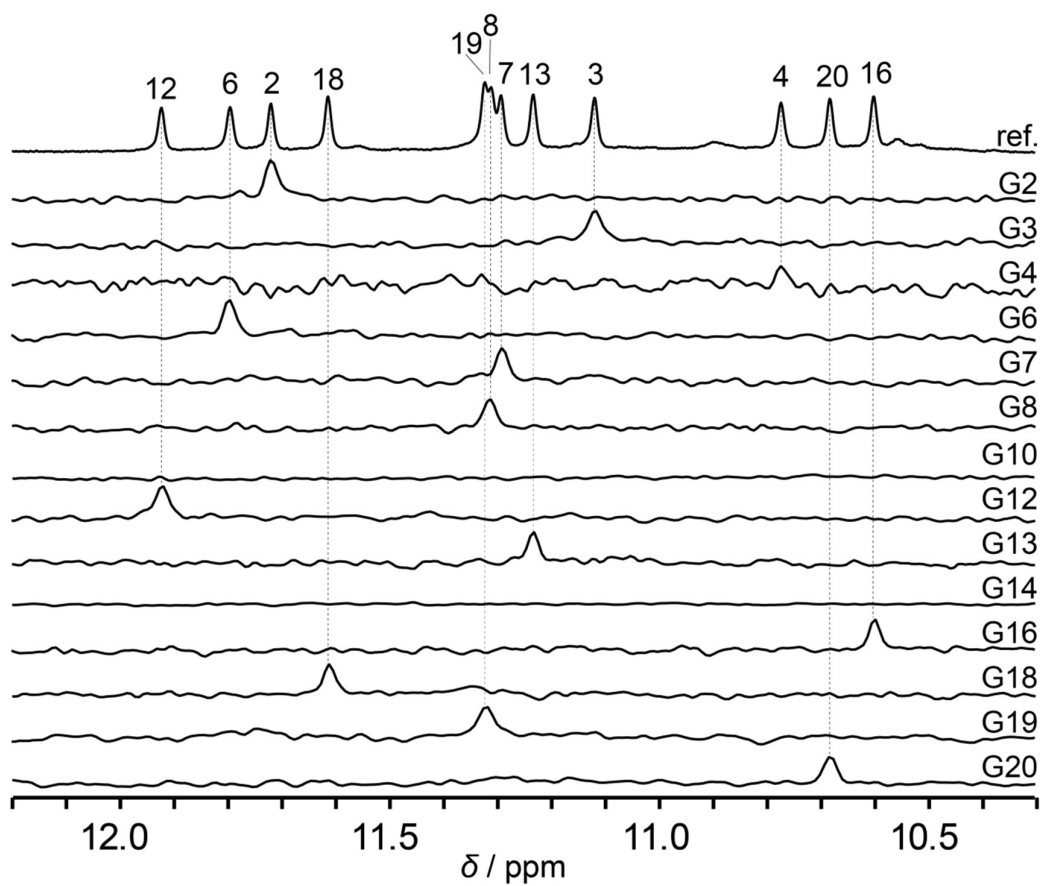

**Figure S5.** Unambiguous assignment of imino proton resonances of RAN1\* was achieved by recording 1D <sup>15</sup>N-edited HSQC spectra on partially 6% residue-specific <sup>15</sup>N/<sup>13</sup>C-labeled oligonucleotides of RAN1\*. Imino region of 1D <sup>1</sup>H-NMR spectrum of RAN1\* (ref.) and assignment of imino resonances are shown on top. Spectra were recorded on Agilent DD2 600 MHz spectrometer at 25 °C in 90% H<sub>2</sub>O, 10% <sup>2</sup>H<sub>2</sub>O, 50 mM KCl, 10 mM potassium phosphate buffer with pH 7.0. Oligonucleotide concentrations were 0.6 mM.

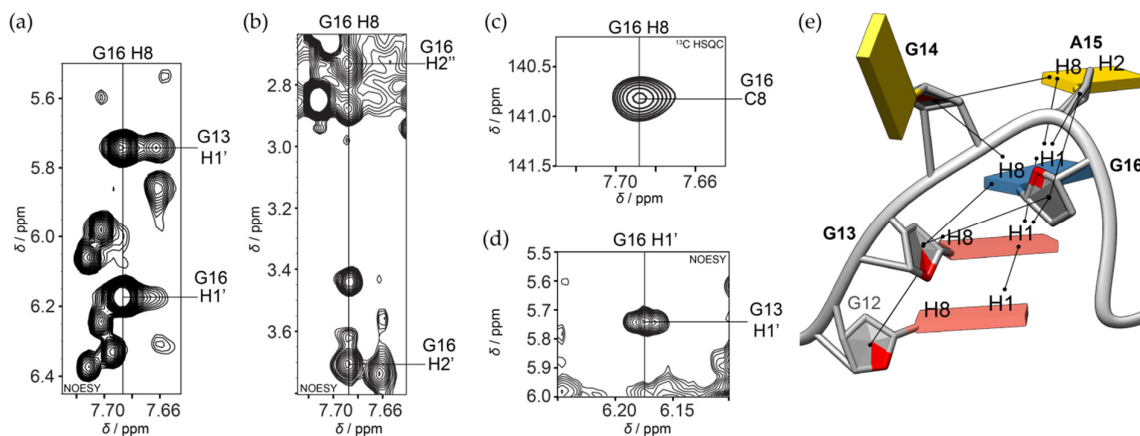

**Figure S6.** NMR observables that indicate *syn* glycosidic conformation of G16. (a) Section of aromatic-anomeric region of NOESY spectra of RAN1\* showing intensive intraresidual H8-H1' NOE contact of G16 and interresidual H8 G16 – H1' G13 NOE connectivity, respectively. (b) Aromatic-H2'/H2'' trace of G16 in NOESY spectra of RAN1\*. Downfield chemical shifts of H2' and H2'' corroborate *syn* glycosidic conformation. (c) Aromatic part of 2D <sup>13</sup>C-HSQC NMR spectra showing C8-H8 cross-peak of G16. Chemical shift of carbon C8 over 140 ppm is typical for residues in *syn* glycosidic conformation. (d) Intense NOE cross-peak between H1' atoms of G13 and G16. (e) Schematic representation of NOE contacts between G16 and surrounding residues G13, G14, and A15.



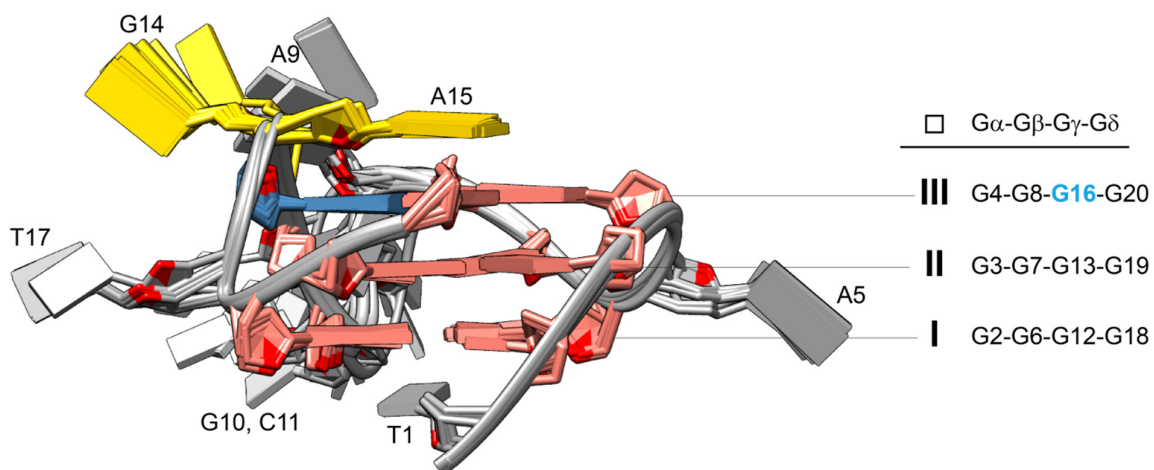

**Figure S7.** Ten lowest-energy structures of RAN1\*. Guanines that participate in G-quartets and are in *anti* glycosidic conformation are colored salmon, while guanine G16 that resides in *syn* conformation is blue. Detailed arrangement of guanines within G-quartets is elaborated on the right. Residues G14 and A15, constituting the bulge, are colored yellow. Other loop residues and backbone are grey. O4' atoms are red.

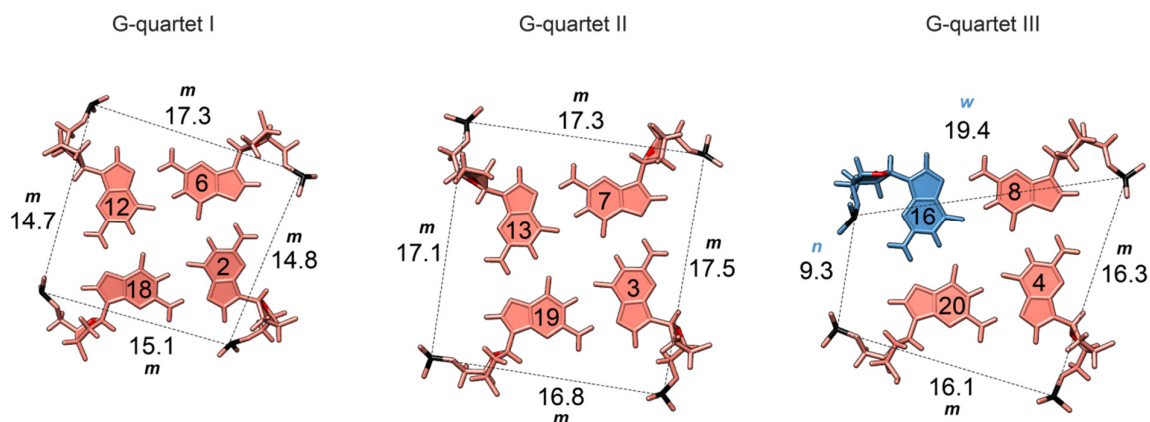

**Figure S8.** Groove dimensions (Å) in RAN1\*. Residues with *anti* and *syn* glycosidic conformations are colored salmon and light blue, respectively. P atoms are colored black. P-P distances between pairs of guanines were measured in UCSF Chimera Software (Pettersen *et al.*, *J. Comput. Chem.* **2004**, 25 (13), 1605-1612) and are depicted with black dashed lines. Labels *m*, *w*, and *n* stand for medium, wide, and narrow grooves, respectively.
